# Supplementary material for: Enhanced oxide ion conductivity in sodium niobate-based ceramics
Source: Royal Society of Chemistry journal article supplement (doi:10.1039/d4tc02119c), 2024-01-01
Supplement: d4tc02119c1.pdf [file d4tc02119c1.pdf]

Supporting information

## **Enhanced oxide ion conductivity in sodium niobate-based ceramics**

Pengrong Ren<sup>1,\*</sup>, Luting Lu<sup>1</sup>, Ming Li<sup>2</sup>, Xin Wang<sup>3</sup>

<sup>1</sup> Shaanxi Province Key Laboratory for Electrical Materials and Infiltration

Technology, School of Materials Science and Engineering, Xi'an University of

Technology, Xi'an 710048, China

<sup>2</sup> Advanced Materials Research Group, Department of Mechanical, Materials and

Manufacturing Engineering, Faculty of Engineering, University of Nottingham,

Nottingham NG7 2RD, UK

<sup>3</sup> Laboratory of Thin Film Techniques and Optical Test, School of Photoelectrical

Engineering, Xi'an Technological University, Xi'an 710032, China

---

\* Corresponding author, [renpengrongxaut@126.com](mailto:renpengrongxaut@126.com) (P. Ren)

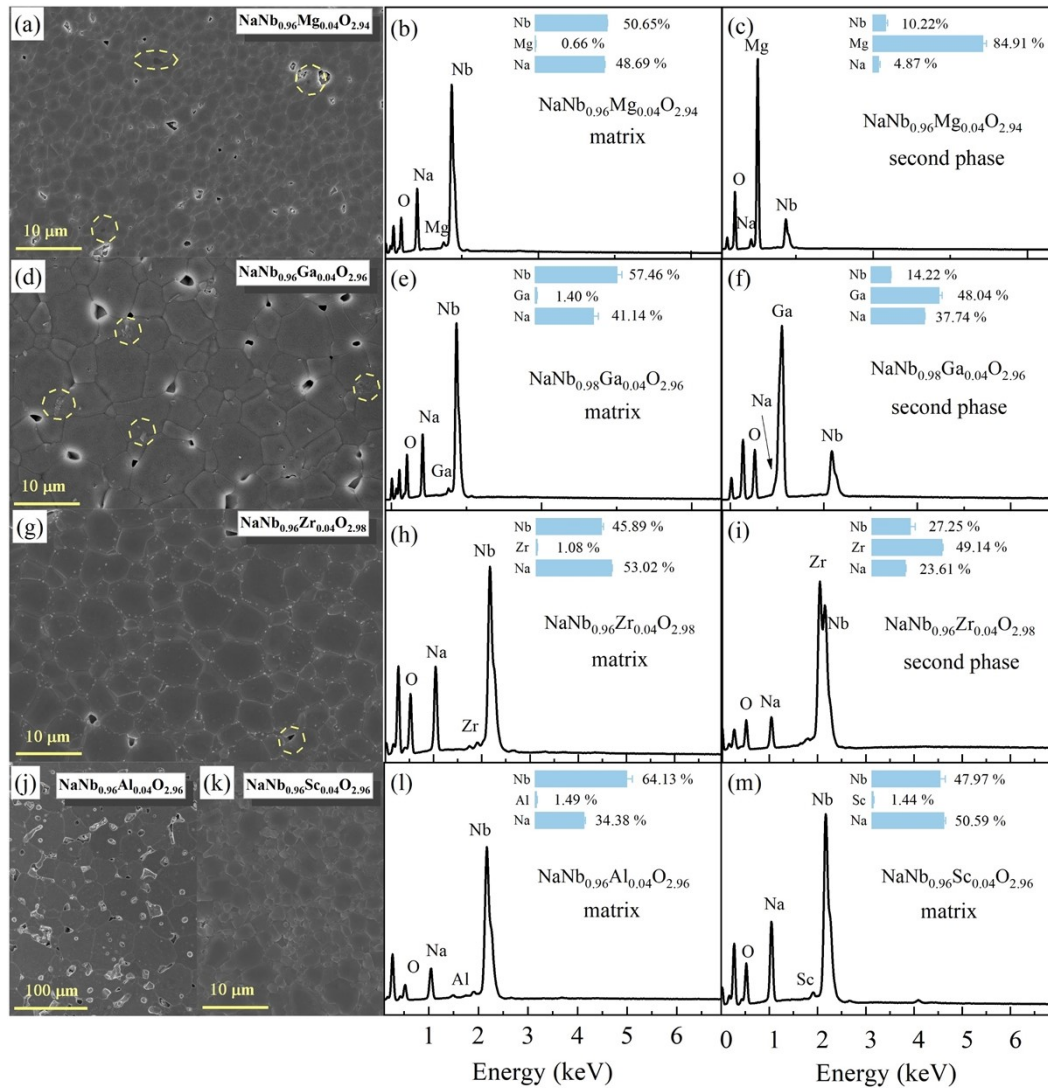

Fig. S1. SEM images and EDS spectra of  $\text{NaNb}_{0.96}\text{Mg}_{0.04}\text{O}_{2.94}$ ,  $\text{NaNb}_{0.96}\text{Al}_{0.04}\text{O}_{2.96}$ ,  $\text{NaNb}_{0.96}\text{Ga}_{0.04}\text{O}_{2.96}$ ,  $\text{NaNb}_{0.96}\text{Sc}_{0.04}\text{O}_{2.96}$  and  $\text{NaNb}_{0.96}\text{Zr}_{0.04}\text{O}_{2.98}$  ceramics. secondary phase marked with yellow dashed circle.

Table. S1. Relative density of  $\text{NaNb}_{0.96}\text{Mg}_{0.04}\text{O}_{2.94}$ ,  $\text{NaNb}_{0.96}\text{Al}_{0.04}\text{O}_{2.96}$ ,  $\text{NaNb}_{0.96}\text{Ga}_{0.04}\text{O}_{2.96}$ ,  $\text{NaNb}_{0.96}\text{Sc}_{0.04}\text{O}_{2.96}$  and  $\text{NaNb}_{0.96}\text{Zr}_{0.04}\text{O}_{2.98}$  ceramics. The optimum sintering temperatures are highlighted in color.

| Samples                                             | Sintering temperature (°C) | Density (g/cm <sup>3</sup> ) |
|-----------------------------------------------------|----------------------------|------------------------------|
| $\text{NaNb}_{0.96}\text{Mg}_{0.04}\text{O}_{2.94}$ | 1025                       | 4.4099                       |
|                                                     | 1050                       | 4.4299                       |
|                                                     | 1075                       | 4.3911                       |

|                                                           |      |        |
|-----------------------------------------------------------|------|--------|
|                                                           | 1275 | 4.2535 |
| NaNb <sub>0.96</sub> Al <sub>0.04</sub> O <sub>2.96</sub> | 1300 | 4.2832 |
|                                                           | 1325 | 4.2020 |
|                                                           | 1100 | 4.2681 |
| NaNb <sub>0.96</sub> Ga <sub>0.04</sub> O <sub>2.96</sub> | 1125 | 4.3770 |
|                                                           | 1150 | 4.3256 |
|                                                           | 1175 | 4.3533 |
| NaNb <sub>0.96</sub> Sc <sub>0.04</sub> O <sub>2.96</sub> | 1200 | 4.4133 |
|                                                           | 1225 | 4.3821 |
|                                                           | 1275 | 4.4142 |
| NaNb <sub>0.96</sub> Zr <sub>0.04</sub> O <sub>2.98</sub> | 1300 | 4.4232 |
|                                                           | 1325 | 4.3943 |

Fig. S2 shows XRD patterns of NaNb<sub>1-x</sub>Mg<sub>x</sub>O<sub>3-3x/2</sub>, NaNb<sub>1-y</sub>Ga<sub>y</sub>O<sub>3-y</sub> ceramics. No secondary phases are detected for all specimens at the detection threshold of the XRD instrument. Fig. S3 shows the typical microstructural morphologies of NaNb<sub>1-x</sub>Mg<sub>x</sub>O<sub>3-3x/2</sub>, NaNb<sub>1-y</sub>Ga<sub>y</sub>O<sub>3-y</sub> ceramics. As shown in the table S1, the relative density of all samples decreases with increasing Mg<sup>2+</sup> and Ga<sup>3+</sup> doping content. Although XRD displays the presence of a pure perovskite structure, the microstructure of the NaNb<sub>1-x</sub>Mg<sub>x</sub>O<sub>3-3x/2</sub> samples also indicate a small number of secondary phases (marked with yellow dashed circles). A small amount of the secondary phases is also presented in the NaNb<sub>1-y</sub>Ga<sub>y</sub>O<sub>3-y</sub> specimen, indicating that MgO and Ga<sub>2</sub>O<sub>3</sub> are not completely dissolved into the NN lattice. As shown in Fig. S3, there are small changes in average grain size

of  $\text{NaNb}_{1-x}\text{Mg}_x\text{O}_{3-3x/2}$ . The average grain size decreases and then increases with increasing  $x$ , from  $2.96\ \mu\text{m}$  for  $x = 0.02$  to  $2.52\ \mu\text{m}$  for  $x = 0.04$  and then to  $3.09\ \mu\text{m}$  for  $x = 0.06$ . The average grain size of  $\text{NaNb}_{1-y}\text{Ga}_y\text{O}_{3-y}$  decreases with increasing  $y$ , from  $4.69\ \mu\text{m}$  for  $y = 0.02$ , to  $4.41\ \mu\text{m}$  for  $y = 0.04$ , and  $4.06\ \mu\text{m}$  for  $y = 0.06$ . The presence of the secondary phase inhibits the migration of grain boundaries, which leads to a decrease in grain size.

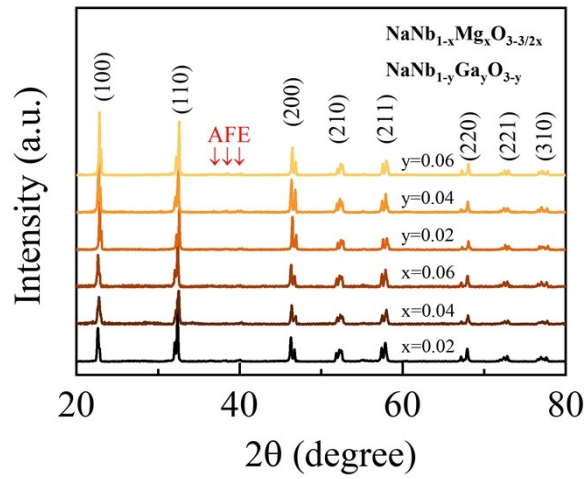

Fig. S2. XRD patterns of  $\text{NaNb}_{1-x}\text{Mg}_x\text{O}_{3-3x/2}$  and  $\text{NaNb}_{1-y}\text{Ga}_y\text{O}_{3-y}$ .

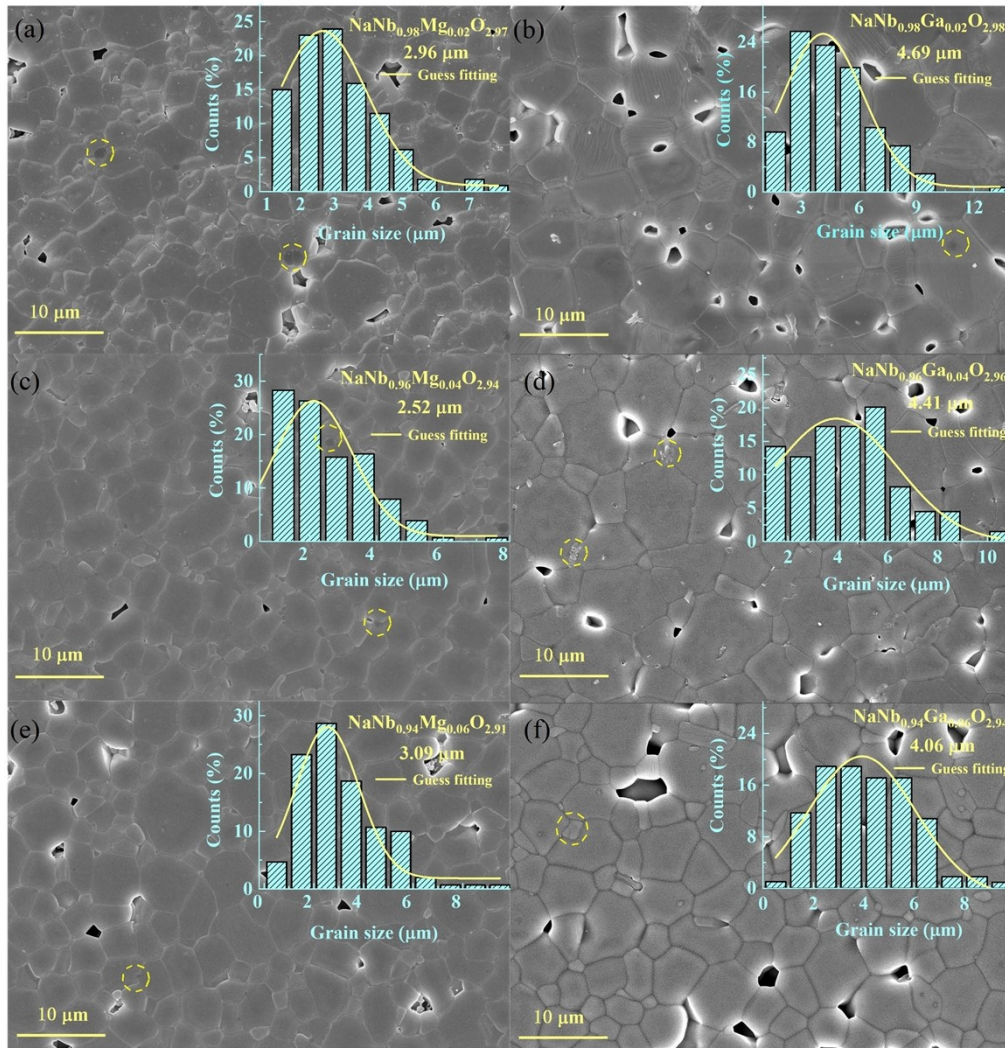

Fig. S3. SEM images of (a, c, e)  $\text{NaNb}_{1-x}\text{Mg}_x\text{O}_{3-3x/2}$  and (b, d, f)  $\text{NaNb}_{1-y}\text{Ga}_y\text{O}_{3-y}$  ceramics.

Table. S2. Relative density of  $\text{NaNb}_{1-x}\text{Mg}_x\text{O}_{3-3x/2}$  and  $\text{NaNb}_{1-y}\text{Ga}_y\text{O}_{3-y}$  ceramics.

| Samples          | x = 0.02 | x = 0.04 | x = 0.06 | y = 0.02 | y = 0.04 | y = 0.06 |
|------------------|----------|----------|----------|----------|----------|----------|
| Relative density | 97.42%   | 97.20%   | 96.93%   | 96.69%   | 96.51%   | 96.33%   |

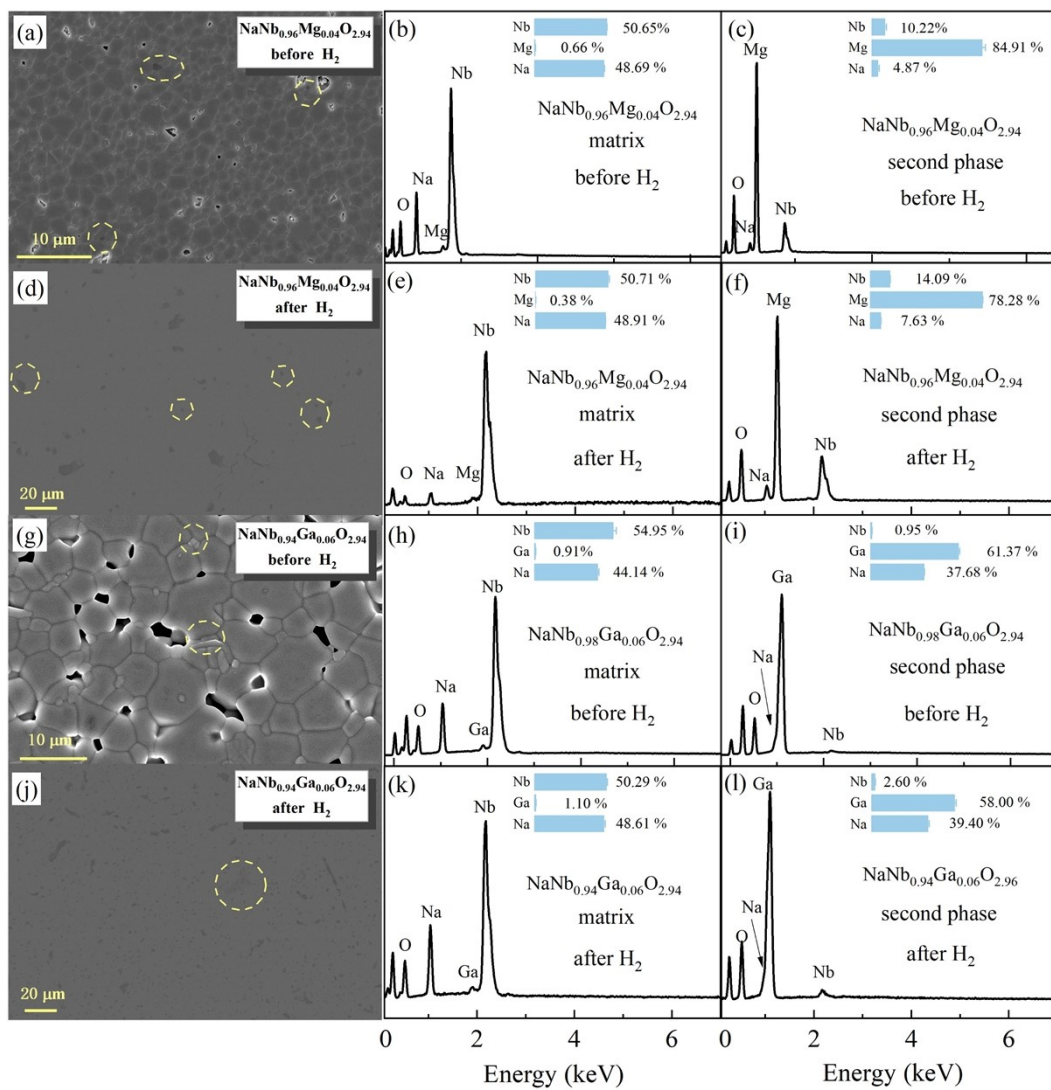

Fig. S4. SEM images and EDS spectra of  $\text{NaNb}_{0.96}\text{Mg}_{0.04}\text{O}_{2.94}$  and  $\text{NaNb}_{0.94}\text{Ga}_{0.06}\text{O}_{2.94}$  before and after annealed at 600 °C for 6 h in  $\text{H}_2$ . The secondary phase is marked with yellow dashed circle.
